# Supplementary material
Source: publisher site journal article supplement (https://www.dovepress.com/get_supplementary_file.php?f=349249.docx)
Supplement: Supplementary file 1 [file get_supplementary_file.php]

**Supplementary material**

**Risk factors for mortality** **among mechanically ventilated patients requiring pleural drainage**

Sojung Park1; Won-Young Kim2; Moon Seong Baek2,*

1 Division of Pulmonary and Critical Care Medicine, Department of Internal Medicine, Mokdong Hospital, College of Medicine, Ewha Womans University

2 Department of Internal Medicine, Chung-Ang University Hospital, Chung-Ang University College of Medicine, Seoul, Republic of Korea

***Corresponding author**

Moon Seong Baek, MD

Department of Internal Medicine, Chung-Ang University Hospital, Chung-Ang University College of Medicine, 102, Heukseok-ro, Dongjak-gu, Seoul 06973, Republic of Korea

Email: [wido21@cau.ac.kr](mailto:wido21@cau.ac.kr)

Table S1. Changes in the PaO2/FiO2 ratio

|  | Survivors (n=40) | Non-survivors (n=42) | P-value |
| --- | --- | --- | --- |
| Day –3 | 214 (88) | 244 (148) | 0.717 |
| Day –2 | 201 (73) | 211 (79) | 0.571 |
| Day –1 | 214 (78) | 233 (136) | 0.954 |
| Baseline | 201 (67) | 210 (85) | 0.919 |
| Day 1 | 254 (98) | 236 (92) | 0.490 |
| Day 2 | 247 (95) | 236 (97) | 0.468 |
| Day 3 | 263 (100) | 229 (104) | 0.102 |

Values are presented as mean (standard deviation).

Table S2. Changes in the vasopressor doses

|  | Survivors (n=40) | Non-survivors (n=42) | P-value |
| --- | --- | --- | --- |
| Day –3, µg/kg/min | 0.048 (0.16) | 0.05 (0.12) | 0.226 |
| Day –2, µg/kg/min | 0.03 (0.08) | 0.10 (0.20) | **0.035** |
| Day –1, µg/kg/min | 0.04 (0.13) | 0.11 (0.22) | **0.009** |
| Baseline, µg/kg/min | 0.09 (0.24) | 0.11 (0.14) | **0.021** |
| Day 1, µg/kg/min | 0.04 (0.08) | 0.09 (0.11) | **0.003** |
| Day 2, µg/kg/min | 0.02 (0.05) | 0.10 (0.13) | **0.001** |
| Day 3, µg/kg/min | 0.01 (0.04) | 0.08 (0.18) | **0.011** |

Values are presented as mean (standard deviation).
